# Supplementary material for: Foreign Body Reaction Associated with PET and PET/Chitosan Electrospun Nanofibrous Abdominal Meshes
Source: PubMed Central journal article supplement (PMC3989343; doi:10.1371/journal.pone.0095293), 2014-04-16

**Figure S3. Example of omentum adhesion to a PET mesh.**

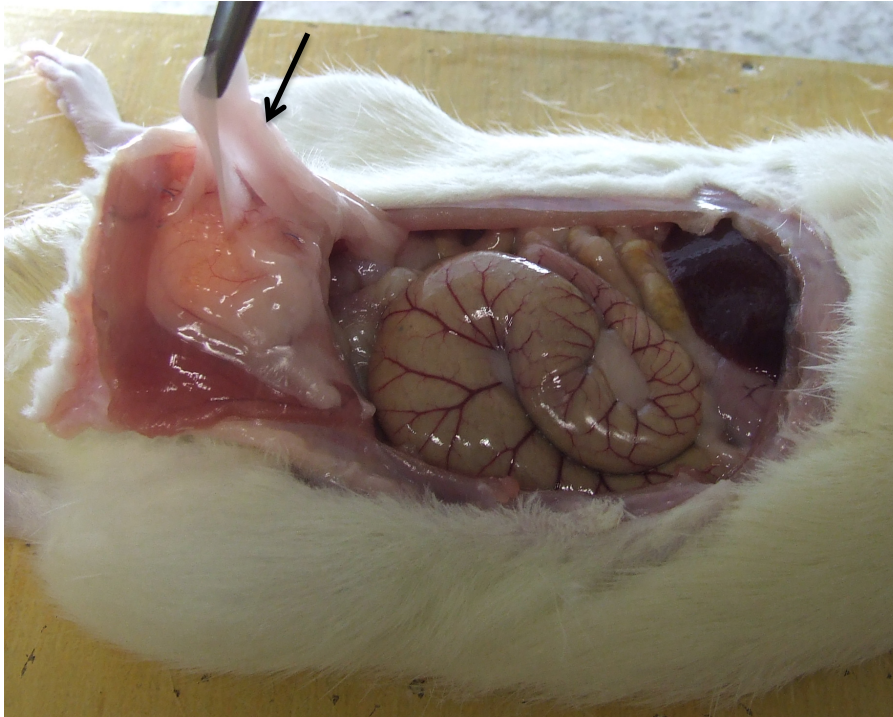

Supplement: pone.0095293.s003.pdf [file pone.0095293.s003.pdf]
